# Supplementary material for: Spermatid Cyst Polarization in Drosophila Depends upon apkc and the CPEB Family Translational Regulator orb2
Source: PubMed Central journal article supplement (PMC4022466; doi:10.1371/journal.pgen.1004380), 2014-05-15
Supplement: pgen.1004380.s005.pdf [file pgen.1004380.s005.pdf]

***apkc*-RA 3' UTR with three CPE sequences in bold and underlined:**

CAAGCAAACACAATCCGTCTACTGGCAATATAACTTTGTTAAGTATTA  
AAAAAACTTTTGTTTTTAATGCATTCCACTGTACTTACAACAACA  
CAAAAAACA  
TATATATATTTATTATTTTGTGTTATTTGTGATGGCATATATAGT  
GCCAGCATC  
TTTTTGTAAATCCACATATGAATATTACGAAAAATTATTA  
AAAATTAGTATATA  
TCAAAAATATCATTGTGTTGCGAAGGTAATAAAATATTGTGTT  
TTTTAATTG  
AAGCTAAAGATAAATTTTCAGCAAAAATGTTACTTGTTAATGTAT  
GAAAAGCA  
AATAAAAGAGAACAAATTAAGCGCATATTGTTAAATTTCCAAAT  
ACAACGCA  
ATCTAAGAAAGTAATATTGATCAAAGTTTTTGATTAAAGAACA  
TAGCAAGCA  
ATCAATTTAAATGCAAAACAAACAGGACAACTGAAAAACAATTT  
CAAATTG  
CACTTAAACGTTACCGATTTTTAATTAGTAACAACCAATATTCTTT  
TAGCCTATCC  
CAATTATTATGTTGTTGTGTTGATAACCAAGTTCTATGAGTAAGT  
TTAATTA  
GTATATAATGATTTTACTGAGCGTATAACATCAATTTGTATCTTCT  
TCAACTG  
ATGTTTCCGACTAATTTTTTAACTGGATGCACCTTTTGGCATATA  
CTACCAGA  
TGCTAGCAAAATGAAATTGAAAACGTAAACGATAGTTGCGTTACA  
ATTATGC  
ATATAAAGAAAAACGAATAAAGTATTGTATAAGAC

***apkc* Gel shift probe sequences:**

*apkc*-RA probe:

GCAAACACAATCCGTCTACTGGCAATATAACTTTGTTAAGTATTA  
AAAAAAAAAA  
ACTTTTGTTTTTAATGCATTCCACTGTACTTACAACAACAACA  
AAAAACATATA  
TATATTTATTATTTTGTGTTATTTGTGATGGCATATATAGTGCC  
AGCATC

*apkc*-com probe:

ACCACGAAATGTGCGACTTACATCCGTATAACATGCGGCTCTAT  
GGCGAGGA  
TTCCAGTGATTACGATTCCGTGGCTGACGATTTGAGTCTCCTGC  
ATTTGAACA  
GCGCAGCGGGAGCTGGTGGATCAGTTAGCAGCAATAACAATCTC  
AGCCAGCA  
GC

**Gel-shift competitor sequences:**

CPE containing competitor (competitor A):

ACU UUU GUU UUU AAU GCA UUC CAC

Non-CPE containing competitor (competitor N):

GUG CGA CUU ACA UCC GUA UAA CAU G

***orb2*-RH 3'UTR with thirteen CPE sequences in bold and underlined (other *orb2* mRNA isoforms have shorter 3'UTR that are part of the RH 3'UTR sequence):**

CGGCGGCGCTGGTAGGCCGCGCTGCACGACGAGAGACGCCAACAG  
AGGGAG  
CAACGACACCGGTTGTTAAACGCAGCGCTGGCAGTGCCAGAATCA  
TAAACAG  
AATCATCAGGATCGGGAGGAGTCGCAGAAGGAGCGGGAGTGGCAG  
CACTAG  
ATGCCGCTGGCGGAGATGCGGATCGAAGGCGAAGAATCTAGTAG  
ATAACCAT  
TAGAGACAACACACGCACCACCAACCCACTCACACACAACAGT  
CGGATAC  
TATTCTCATAAGCAAAAGACAATTGCCCGGGGAATCACCCATTCC  
GAAGGG  
CAAGGTGCAAATACAACGGGAGCTGGACAAAGGTGTCCCTTTGA  
ATAGCCAC  
CAGAGTCTACAGTTTTAGAGGCGAGAAACGAAAGCAACATAGT  
TTTTAGTTC  
TTATTTATTCGGCAATCAGTTTTTTTTTTTTGTTTCGCGCTTGCT  
AGTTTTACAT  
TTGCTTAACCGAAATTTTAGTTTTGATTTTTCGTTTCGATGCCTGC  
ACAGTATTT

TTTGTACTTTATATTTTTAGCAACATTTATGTTTGCTAATATGTTATTTAATCT  
CACAAAAGAAAAAAGGAACCCCTCGTAGTCAGCCAATTTCCCTCGCAA  
GGCCCGTTACATATATTATAATCTTTTTGTAAGTACTAGATAACTTAGTAGCCAT  
CATCTTGTATGCCAATCGAGGCTAGTCCTAAAATTATTAGTGAGCTGCTCACC  
CTCTCTCGAAAAGGCTTTTTGCTTGAGTGTGCAGGGGCTGTCCTTAAGTTCCT  
AAATTGTGACAAAATCAAACACTACATCGGTTTTTGTATTAGCCCTTTCCGAAA  
TTAGATCAATTTATAAAATCTTACAAAAGACTTTAGAAAAGACAATATGCA  
AAATGTCTGACATTTGTATGCTAGCCATTTCTTACGACACAATTGGTAAGAGA  
TCGCTTAATCATATCATATCTGCATACAGTTATAATCCCTATTTATTTTTGTTT  
AATCCTTACATAATACGGTCTATTAGCATTCCCCTGAAGAATCGTATATATT  
ATCTGTGCAATATATTCGATTGCTTCTCCGTTACATGCTGCTAATTCTTGCTTA  
TCTAACACTTATATAATTATTGTATGTGAAAATCGTACAAAGCTTATAAAACA  
CACAAAACCAATAGGTGGCGATTGCTTCCCCGTTACATGCTACTTATTCCTGC  
TTATCTAATTATATAATTAGGGTATGTGAAAATCGTACAAAGCTTATACACTT  
ACTAAACGATTCTTAACTTGTTACCCTCCTGCCAATAGGTGGCTTTCCTACTAC  
GATTTTCACACGACTCCGTTTTATGTTTTGCTGGCACATTGAAATCACACTAA  
TTAATGAGTTTAAACCCACACTCTGAGATAGGTTCTTCTTTCCTAATATTGA  
TGGCTCATTTTTAATTATAATCTAGTCCACACTCATACATACACGTACGTACA  
CAGACAACAACAACACATTTACACTGAAAGTCTGTTTGCATTTGTTGCCA  
TTTGGCTTAATGAAGAAAAAATAATAATAAAAATATACATATAATTAGA  
AAATGTAGAAAAAACAACAGTCAAATTGCTTGTGTTTCAGTATTATGAT  
TTATTTATGATTTTCCACTGAAATGTCATATTTTGTATTATTATTAACCAATTG  
TTTTTGTATTATAATTTACGGCGTGTTGCTAACTAAGGGACAGCGGGCTCACC  
TCCCGAAGCTATAGAAGAACGTATATATTGCAAATATATAAATATATCTG  
TAATGTAAAAAGTAATTTTTATATACGACATACATCTATTAACACTATGAAT  
ACTTGTATTAGACAACCTTTTTATATAGAACTTTTGTATAAACTTTTTTTTTAT  
TACTCTTATGATTATTCAGAAGTTAGTTTAGTCCAAACAACCTGAATACAAAA  
TAAAACCAAAAACGCGAAGATAAATAGACATGCTAAAACATTTAAAGAAAA  
TTAAATATATACAAATTATGTGCAATACTATTTTCGTGAACGATTCAAGCGTA  
TTATTGAATACCAAATATATAAACAACCTTAAAAAAGATATGTATCTGTACAA  
ACATAACGTATACAAGATAATTGCAATCGTATAACCAAAGTAGTCAAATATT  
ACCAAAACCAATGGTTCCCCAACTTTCAACTAATTGGCATGCGTTTTTTGA  
CATGCGAACAGGGCTTAAAGTTCGCGTTTGGTTATTTCCCCGTGAATCCTAAC  
TATAAAAATCAAATGGAATATCTATCTATACCTAGGGCAATACTTATGGAAA  
ATTATCAAATGTAAATCGAGCAAAATTATTTGTAAATTATACGCGTTAAGG  
AACGAGACAAAATTTGCTACGGTGCATGCAAACAATACGATATTTTTTTCTATA  
CTACCAGCAAAAGTACTAAAGATCTAATTCGAATTGATAAACCAAAAACGTG  
AGAGGTCAAGTCGCTTTGGACTTCTATGATATAATTAATAAATAATAGTCAA  
ATCTATTAGCAAATTTTTGCTCGCGCTTTCTTTACAAGACAACAAAAA  
AAAAGAAAAACAATTTAAGTCATGCAAAGTTGTAAGTCAAGTTGATTGC  
GTGGCACTTTCAAAGAAAAACAAGTTTATAGCAATTTTTCTAGAATTTTTATA  
TTACAATGAACTATTGAATATGTATCATATATATACTACATATATATTTTTT  
AAACCGCAAAACCAATTAATTAGTGGACTCGAAGCGTTCGTTTGTGTTTGGTTA  
TAATTTATTACTTTTAAATACTTACCGAAATATCGTGTATTAAGCGAATGA  
TTCTACACAAAACAACCAACAAGCCCAATTAATATTATATCAAATACA  
ACAGCCTGCTCTATGTAGTGTTAAACAATTTGTGCAAATATGTTCTAAAACCTT

TCAAAGTAATTAAATGCTAGTCTTTATAAAGGCCAAAATCTGTTACAAAAGCA  
AACACGGAACGGAAACGGAAATCGGTTAGCGGTAAACGGCAATCGGTCAAT  
GGCTATCGATAACTGTGCGTAATGATGGTGTTTTTTTAAATGTAGTAAAATTT  
AATATTTTATAGATTTTATACTTTTATATAACATATACTTTATATTTTACCT  
GTTTAAACAAAACCTCAATGAAAATGTTAAAAAAACTTAATGTGCTATAAAG  
AAGTAACTTATCAAACAAATATTTTACTATACCAAAAAAAGTTGATAGAGAT  
GAGAATTCTTTACGGAAAACCGCTCAATGTTTTTGCTGCTAACGACGTAGGA  
ATCTGGAATCTTGTGTAGCGTGTTAAAAAAATATTTATATCAATAAGCAATCC  
TTAATCCTTTTTGTTCTGTTTCATTATTTATTTTGTTTCCCGAGTATTCCATAAA  
AATTAGGCAAAGACGTTTAAGTTATCCTACTTCTGAGCTTGGATTACGGATAT  
AAGTCGGATTGACAGCTTTAGTTTATAGAGAATCTTGTTATAGATAATGTTT  
ATGTTGACTTTTATATGGATCCTGTTATTATACCGATAATGACAATGAAAA  
TTTGTATGCCTAATTCTTAAATATATTTTTGTATCTTTTGTAGTTGCAAGTAGT  
TTCCTGGTAGTTTAAAAAACAACACTCCGTTGAGACATTTTATACTTT  
GTTTATTCTTATACGTATACATATTTTAAAAAAATATGACAAAAACAAT  
ATTTGATATATACACTTTATACAAAAGAAAAAATGGAAAATGAATGAAAAA  
AGTTTTTGAATTAATAAACGGACATAAAGT
